# Supplementary material for: Genome-Wide Identification and Transcriptional Expression Analysis of Cucumber Superoxide Dismutase (SOD) Family in Response to Various Abiotic Stresses
Source: Hindawi journal article supplement (doi:10.1155/2017/7243973), 2017-01-01

SignalP-4.1 prediction (euk networks): CsCSD1

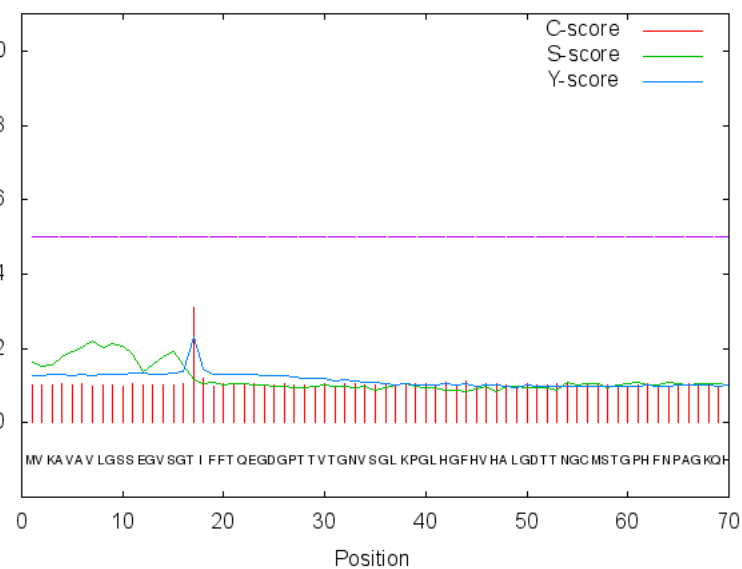

SignalP-4.1 prediction (euk networks): CsCSD2

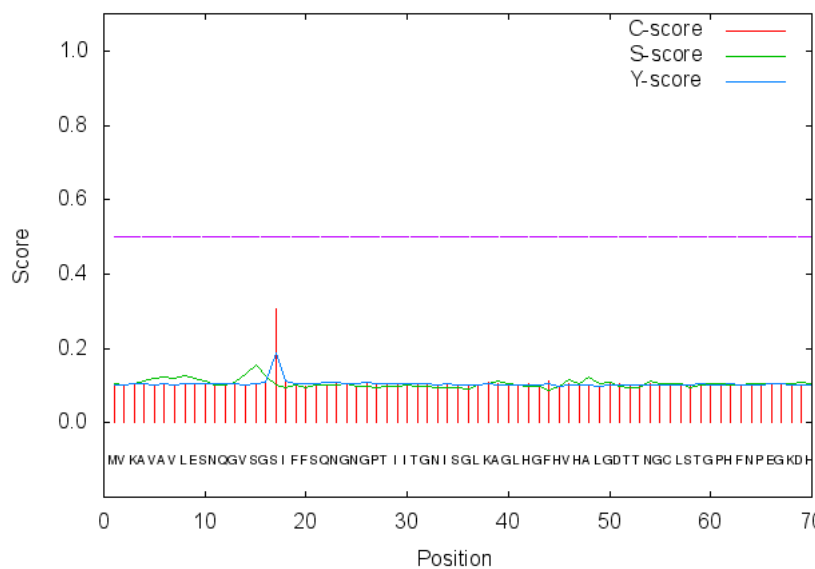

SignalP-4.1 prediction (euk networks): CsCSD4

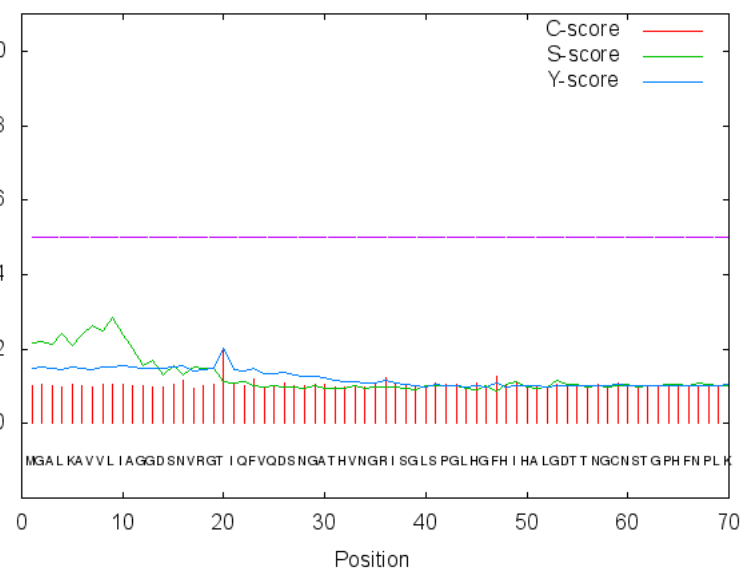

SignalP-4.1 prediction (euk networks): CsCSD5

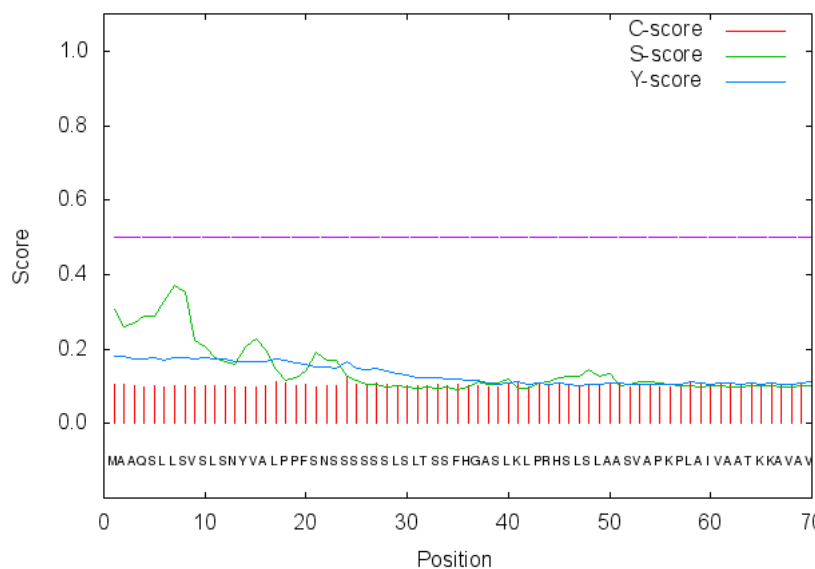

SignalP-4.1 prediction (euk networks): CsFSD1

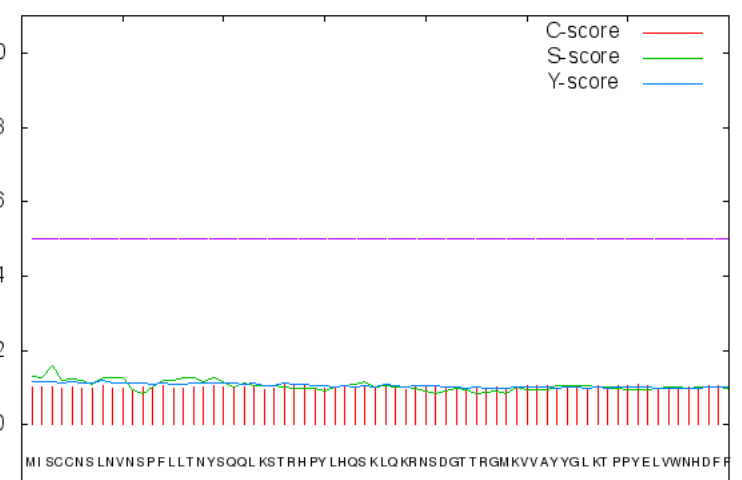

SignalP-4.1 prediction (euk networks): CsFSD2

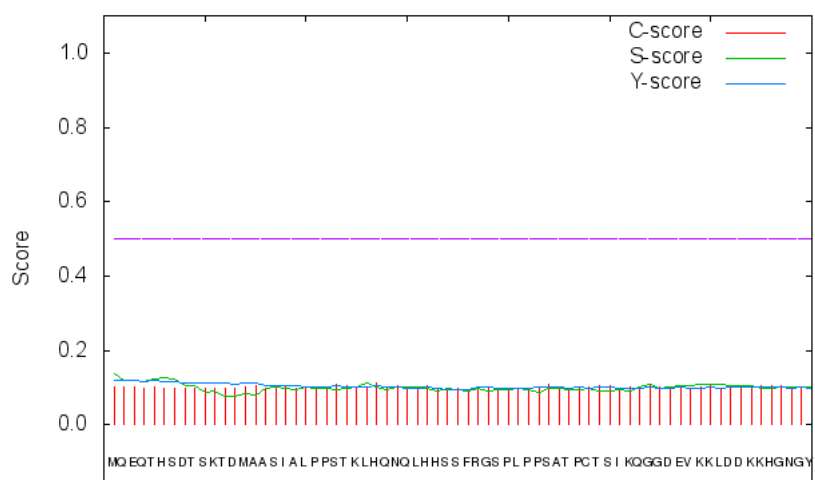

Supplement: f1 [file 7243973.f1.ai]
