# Supplementary material for: Genome-Wide Identification and Transcriptional Expression Analysis of Cucumber Superoxide Dismutase (SOD) Family in Response to Various Abiotic Stresses
Source: Int J Genomics. 2017 Jul 20;2017:7243973. doi: 10.1155/2017/7243973 (PMC5541821; doi:10.1155/2017/7243973)
Supplement: Supplementary file 7 [file 7243973.f7.xls]

## Sheet: Sheet1
Table S4. The predicted promoter elements of CsSOD genes.
	Motif name	Annoation	CsCSD1	CsCSD2	CsCSD3	CsCSD4	CsCSD5	CsMSD	CsFSD1	CsFSD2	CsFSD3
Essential element	TATA-box	core promoter element around -30 of transcription start	32	33	35	50	21	19	36	109	6
	CAAT-box	common cis-acting element in promoter and enhancer regions	17	22	34	22	22	28	22	24	11
Enhancer	5UTR Py-rich stretch	cis-acting element conferring high transcription levels	1	1	1				1
Developmental processes	MBSII	MYB binding site involved in flavonoid biosynthetic genes regulation								1
	CAT-box	cis-acting regulatory element related to meristem expression					1	1
	circadian	cis-acting regulatory element involved in circadian control	3	1	1				4	1	3
	O2-site	cis-acting regulatory element involved in zein metabolism regulation	1	2
Abiotic stress	HSE	cis-acting element involved in heat stress responsiveness			3	3		1	2	1	2
	MBS	MYB binding site involved in drought-inducibility		3		3	3	1	2		1
	WUN-motif	wound-responsive element		1
	TC-rich repeats	cis-acting element involved in defense and stress responsiveness	1	1	3		1	2	1
	ARE	cis-acting regulatory element essential for the anaerobic induction	2	1	1	1	1	1
	EIRE	elicitor-responsive element									1
	Box-W1	fungal elicitor responsive element						1
Hormone	ABRE	cis-acting element involved in the abscisic acid responsiveness	3		1	1		1		3	1
	CGTCA-motif	cis-acting regulatory element involved in the MeJA-responsiveness			1	1					1
	ERE	ethylene-responsive element				3		1
	GARE-motif	gibberellin-responsive element		2	2			1	1
	P-box	gibberellin-responsive element								2
	TATC-box	cis-acting element involved in gibberellin-responsiveness			1		1
	TCA-element	cis-acting element involved in salicylic acid responsivenes	1	1	1	1				2
	TGA-element	auxin-responsive element	1				1	1
Light responsive	AAAC-motif	light responsive element	1
	AT1-motif	part of a light responsive module			2
	AE-box	part of a module for light response			1					1
	ACE	cis-acting element involved in light responsiveness			1					2
	ATCT-motif	part of a conserved DNA module involved in light responsiveness		1		1					1
	Box I	light responsive element		1		3		4	3	3
	Box II	part of a light responsive element									1
	C-box	cis-acting regulatory element involved in light responsiveness	1
	Box 4	part of a conserved DNA module involved in light responsiveness	2			2				3
	CATT-motif	part of a light responsive element						1			1
	TCCC-motif	part of a light responsive element					1
	GA-motif	part of a light responsive element	1		1	1		1
	GAG-motif	part of a light responsive element		1	1
	Gap-box	part of a light responsive element					1
	GATA-motif	part of a light responsive element						1
	G-Box	cis-acting regulatory element involved in light responsiveness	6		3	5		2		5	1
	GT1-motif	light responsive element				2	1		1		1
	I-box	part of a light responsive element		1				1
	L-box	part of a light responsive element						1
	Sp1	light responsive element	1				2		5		1
	3-AF1 binding site	light responsive element								1
	TCT-motif	part of a light responsive element	1			1	1
	as-2-box	involved in shoot-specific expression and light responsiveness					1
Tissue specific expression	GCN4_motif	cis-regulatory element involved in endosperm expression		2					1	1
	CCGTCC-box	cis-acting regulatory element related to meristem specific activation					1
	Skn-1_motif	cis-acting regulatory element required for endosperm expression	1	1	1	3	1		1	2
Other cis-elements	A-box	cis-acting regulatory element					1
	OBP-1 site	cis-acting regulatory element			1	1
	CCAAT-box	MYBHv1 binding site					1		1		1
	AAGAA-motif	cis-acting regulatory element	1			2	2		2	1
	AT-rich element	binding site of AT-rich DNA binding protein (ATBP-1)				2		1
	TATCCAT/C-motif	cis-acting regulatory element					1
	ATGCAAAT motif	cis-acting regulatory element associated to the TGAGTCA motif		1					1
	CATTAT-motif	cis-acting regulatory element									1
	W-box	WRKY binding site involved in abiotic stress and defense response						1
	CTAG-motif	cis-acting regulatory element		1
